# Supplementary material for: Antioxidant and Cytotoxic Potential of Carlina vulgaris Extract and Bioactivity-Guided Isolation of Cytotoxic Components
Source: MDPI journal article supplement (doi:10.3390/antiox12091704), 2023-09-01
Supplement: s1 [file s1]

Supplementary material

# Antioxidant and Cytotoxic Potential of *Carlina vulgaris* Extract and Bioactivity-Guided Isolation of Cytotoxic Components

Ireneusz Sowa <sup>1,\*</sup>, Roman Paduch <sup>2</sup>, Jarosław Mołdoch <sup>3</sup>, Dariusz Szczepanek <sup>4</sup>, Jacek Szkutnik <sup>5</sup>, Paweł Sowa <sup>6</sup>, Katarzyna Tyszczyk-Rotko <sup>7</sup>, Tomasz Blicharski <sup>8</sup> and Magdalena Wójciak<sup>1,\*</sup>

<sup>1</sup> Department of Analytical Chemistry, Medical University of Lublin, Chodźki 4a, 20-093 Lublin, Poland

<sup>2</sup> Department of Virology and Immunology, Institute of Biological Sciences, Faculty of Biology and Biotechnology, Maria Curie-Skłodowska University, 19 Akademicka Street, 20-033 Lublin, Poland

<sup>3</sup> Department of Biochemistry and Crop Quality, Institute of Soil Science and Plant Cultivation, State Research Institute, 24-100 Puławy, Poland

<sup>4</sup> Chair and Department of Neurosurgery and Paediatric Neurosurgery, Medical University of Lublin, 20-090 Lublin, Poland

<sup>5</sup> Independent Unit of Functional Masticatory Disorders, Medical University of Lublin, 20-093 Lublin, Poland

<sup>6</sup> Department of Otorhinolaryngology and Oncological Laryngology, Faculty of Medical Sciences in Zabrze, Medical University of Silesia in Katowice, 40-055 Katowice, Poland

<sup>7</sup> Institute of Chemical Sciences, Faculty of Chemistry, Maria Curie-Skłodowska University in Lublin, 20-031 Lublin, Poland

<sup>8</sup> Department of Orthopaedics and Rehabilitation, Medical University of Lublin, Lublin, Poland

\* Correspondence: ireneusz.sowa@umlub.pl (I.S.); magdalena.wojciak@umlub.pl (M.W.)

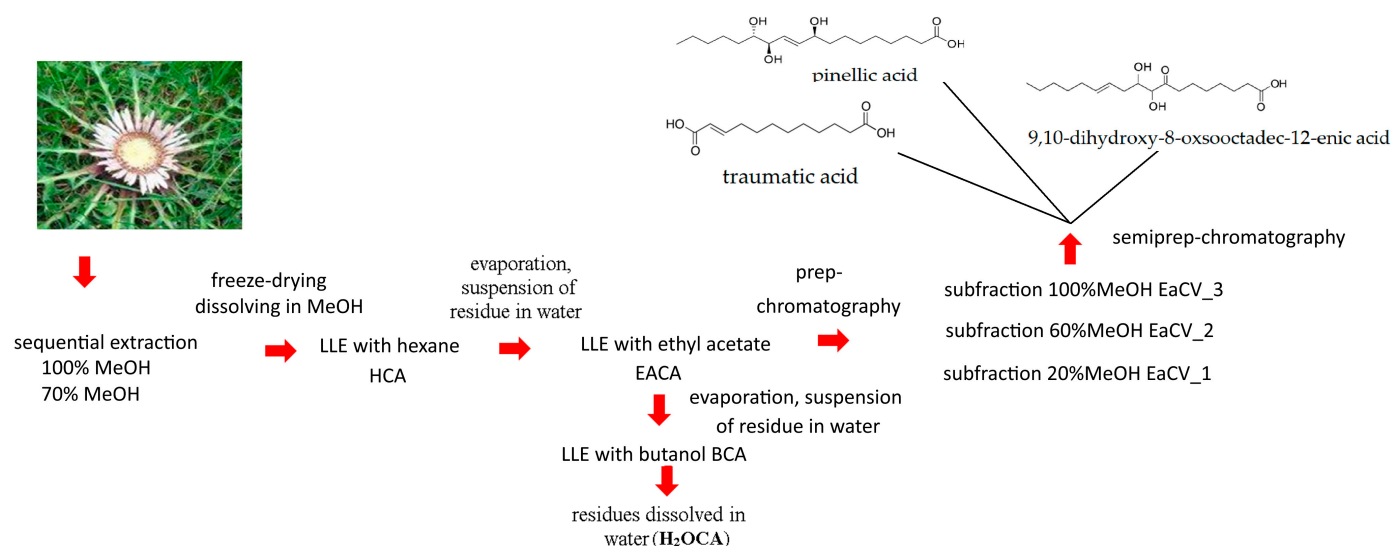

**Scheme S1.** The schematic diagram of the extraction procedure.

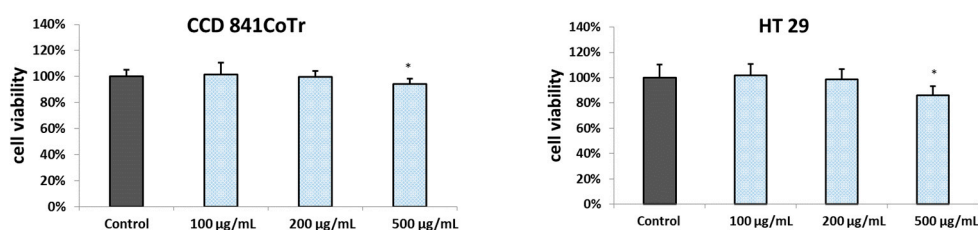

**Figure S1.** Effect of the different concentrations of extracts obtained from *Carlina vulgaris* on cell viability determined by the MTT assay and expressed as a % of control (0.5% of DMSO in medium). The data are means ( $n = 3$ )  $\pm$  SD. One-way ANOVA followed by Dunnett's post hoc test; the differences between samples and control were considered significant at  $p < 0.05$ . \* indicates statistically significant difference.

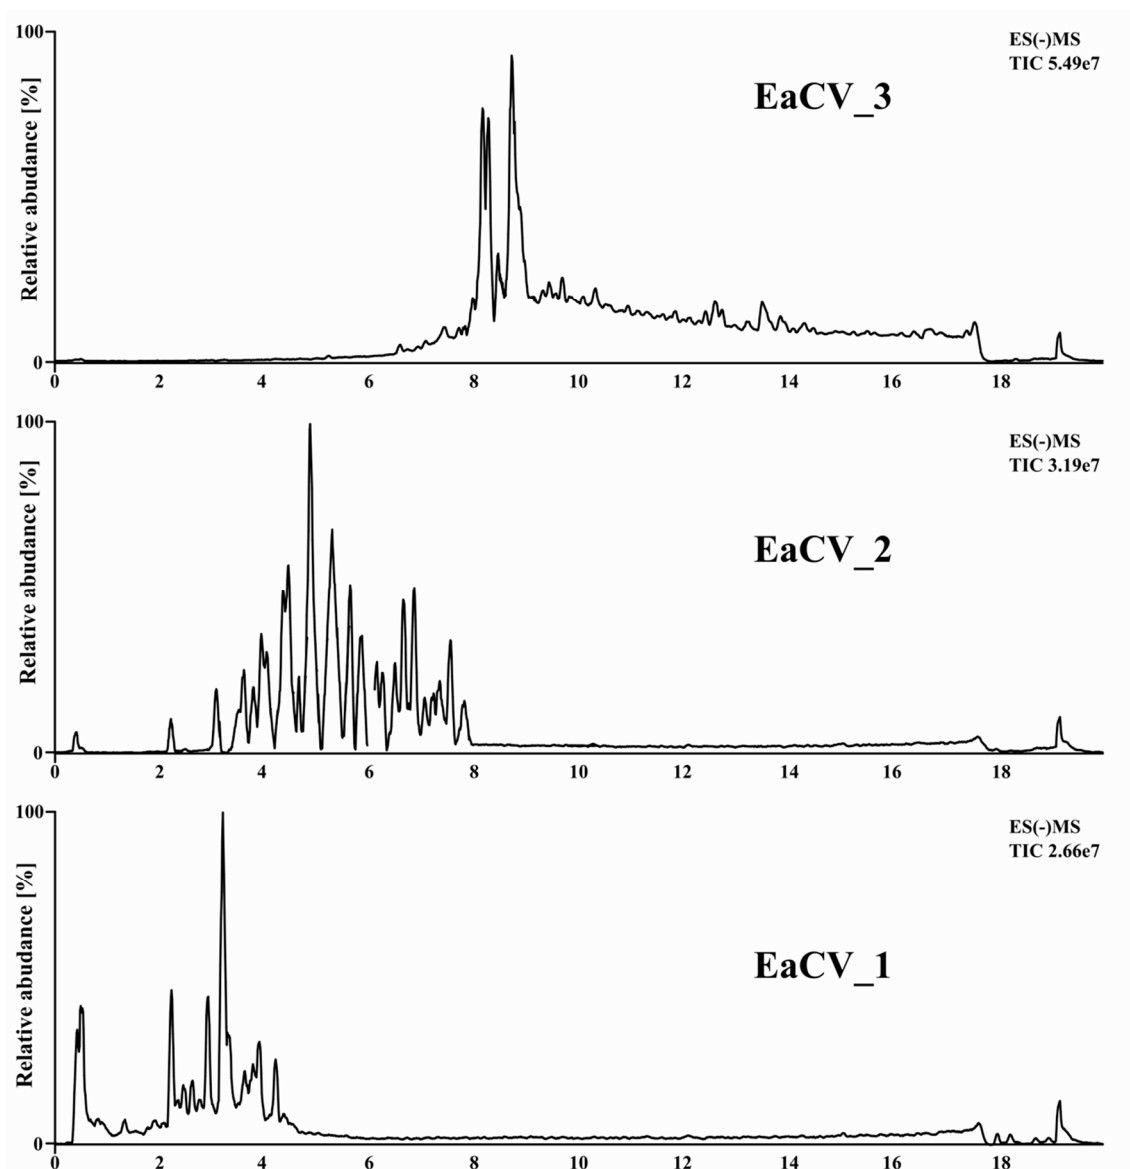

**Figure S2.** The UHPLC - ESI - MS(-) chromatograms sub-fractions from the extract of *C. vulgaris*.

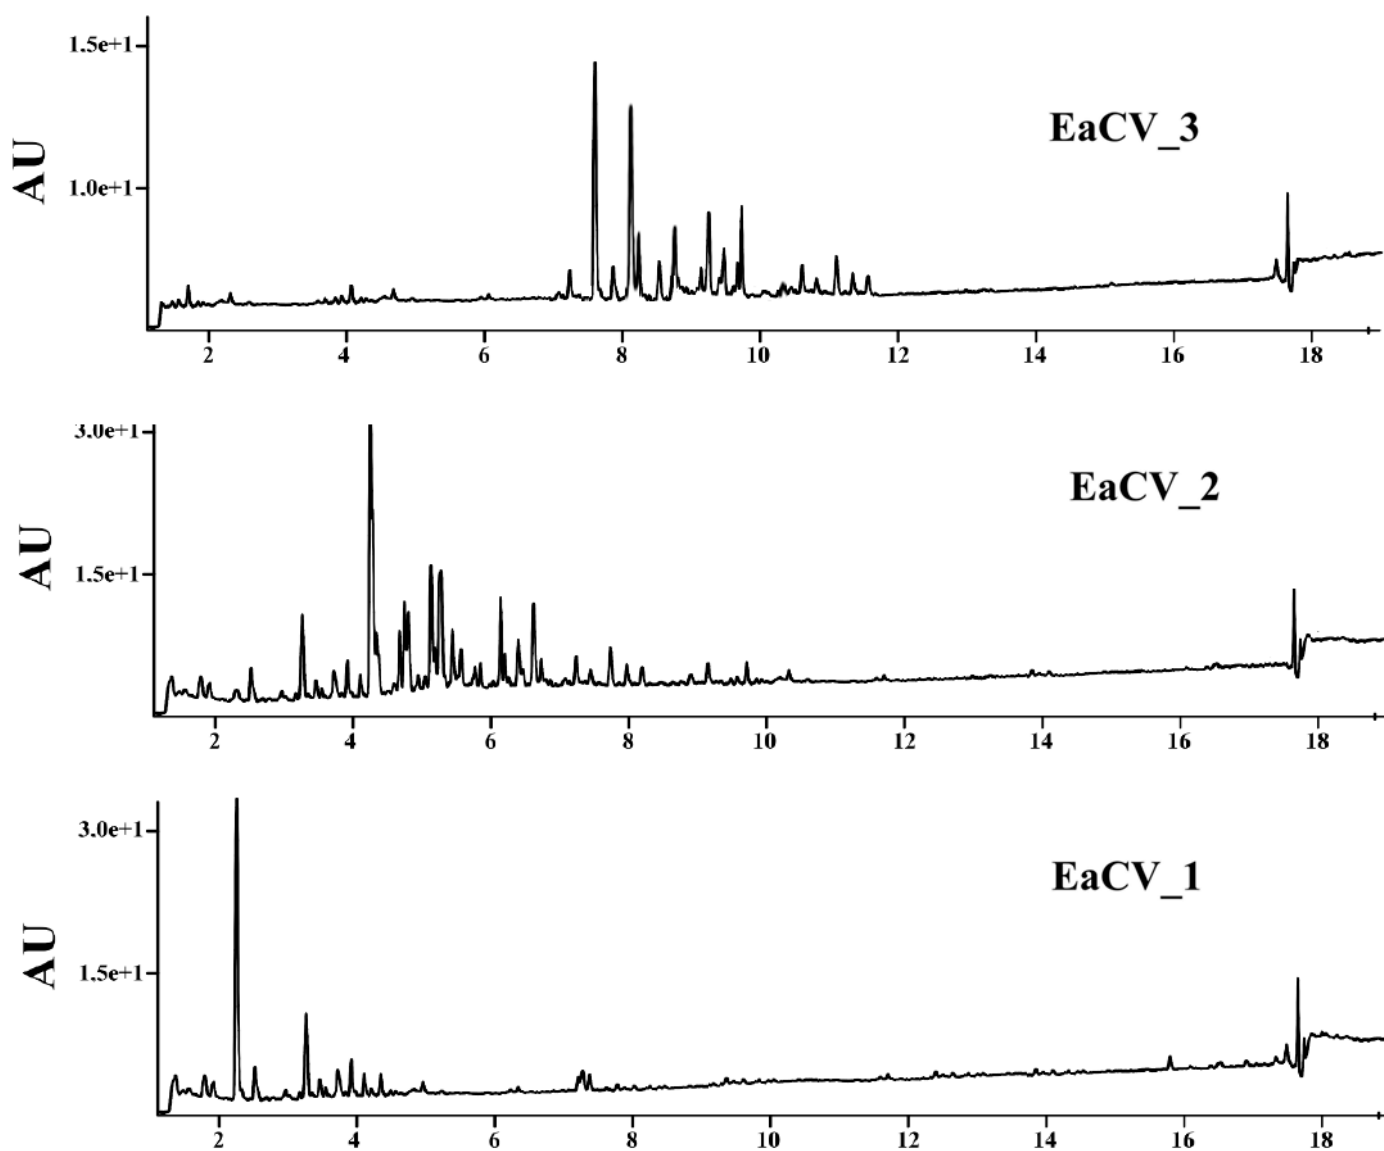

**Figure S3.** The UHPLC-DAD chromatograms sub-fractions from the extract of *C. vulgaris* obtained at wavelength of 254 nm.

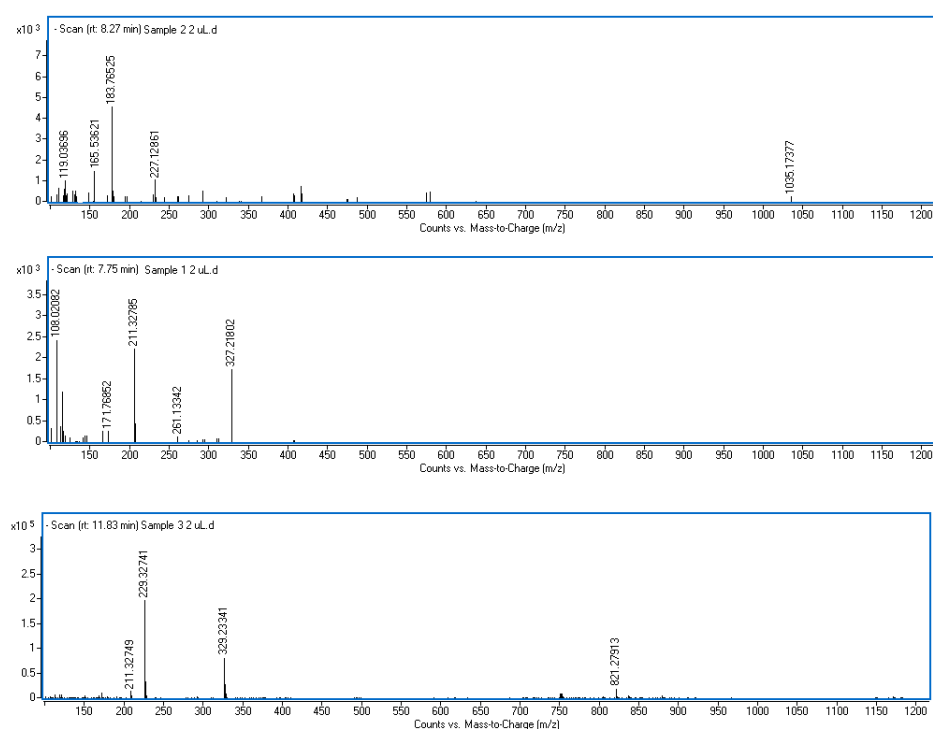

**Figure S4.** Exemplary MS spectra for target compounds (traumatic acid, 9,10-dihydroxy-8-oxooctadec-12-enic acid, pinellic acid).

**Table S1.** The results of radical scavenging activity (DPPH) and ferric reducing antioxidant power (FRAP) obtained for pinellic acid (PA), traumatic acid (TA) and 9,10-dihydroxy-8-oxooctadec-12-enic acid (MUA). Values are means  $\pm$  standard deviation (SD) of triplicate.

| compound | concentration ( $\mu\text{g/ml}$ ) | Equivalent of Trolox concentration (DPPH) | Equivalent of ascorbic acid concentration (DPPH) |
|----------|------------------------------------|-------------------------------------------|--------------------------------------------------|
| PA       | 25                                 | $2.169 \pm 0.204$                         | $0.405 \pm 0.144$                                |
|          | 100                                | $2.588 \pm 0.301$                         | $1.351 \pm 0.144$                                |
|          | 200                                | $3.309 \pm 0.845$                         | $2.500 \pm 0.125$                                |
| TA       | 25                                 | $0.797 \pm 0.516$                         | $0.372 \pm 0.096$                                |
|          | 100                                | $1.762 \pm 0.381$                         | $1.554 \pm 0.125$                                |
|          | 200                                | $2.030 \pm 0.344$                         | $3.014 \pm 0.125$                                |
| MUA      | 25                                 | $0.623 \pm 0.288$                         | $0.912 \pm 0.304$                                |
|          | 100                                | $2.693 \pm 0.418$                         | $3.581 \pm 0.280$                                |
|          | 200                                | $4.030 \pm 0.358$                         | $6.791 \pm 0.201$                                |
